# Supplementary material
Source: PubMed Central journal article supplement (PMC1622788)

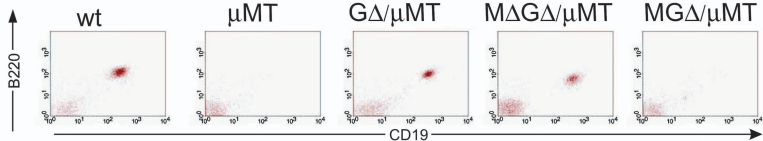

single copy

IgM deletion

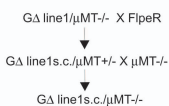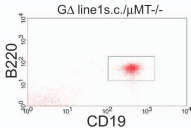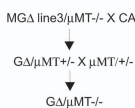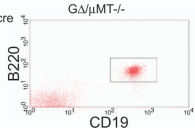

Supplement: pnas_0601108103_1.pdf [file pnas_0601108103_1.pdf]
